# Supplementary material for: Improving the photocatalytic activity of benzyl alcohol oxidation by Z-scheme SnS/g-C3N4
Source: Royal Society of Chemistry journal article supplement (doi:10.1039/d1nj00923k), 2021-01-01
Supplement: d1nj00923k2.pdf [file d1nj00923k2.pdf]

## Supplementary Information

# Improving photocatalytic activity of benzyl alcohol oxidation by Z-scheme SnS/g-C<sub>3</sub>N<sub>4</sub>

Yan Li,<sup>a</sup> Chengsi Pan,<sup>a</sup> Guangli Wang,<sup>a</sup> Yan Leng,<sup>a</sup> Pingping Jiang,<sup>a</sup> Yuming Dong,<sup>a,\*</sup>

Yongfa Zhu<sup>b</sup>

<sup>a</sup> International Joint Research Center for Photoresponsive Molecules and Materials,  
School of Chemical and Material Engineering, Jiangnan University, Wuxi 214122,  
China.

<sup>b</sup> Department of Chemistry, Tsinghua University, Beijing 100084, China.

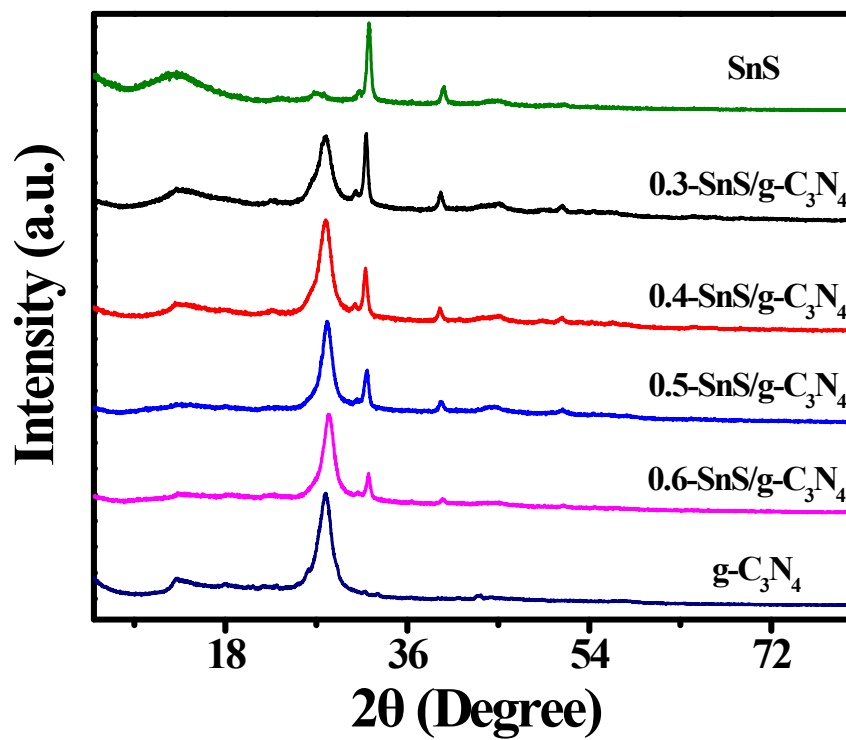

**Figure S1.** XRD patterns of SnS, g-C<sub>3</sub>N<sub>4</sub> and SnS/g-C<sub>3</sub>N<sub>4</sub> photocatalyst in different proportions

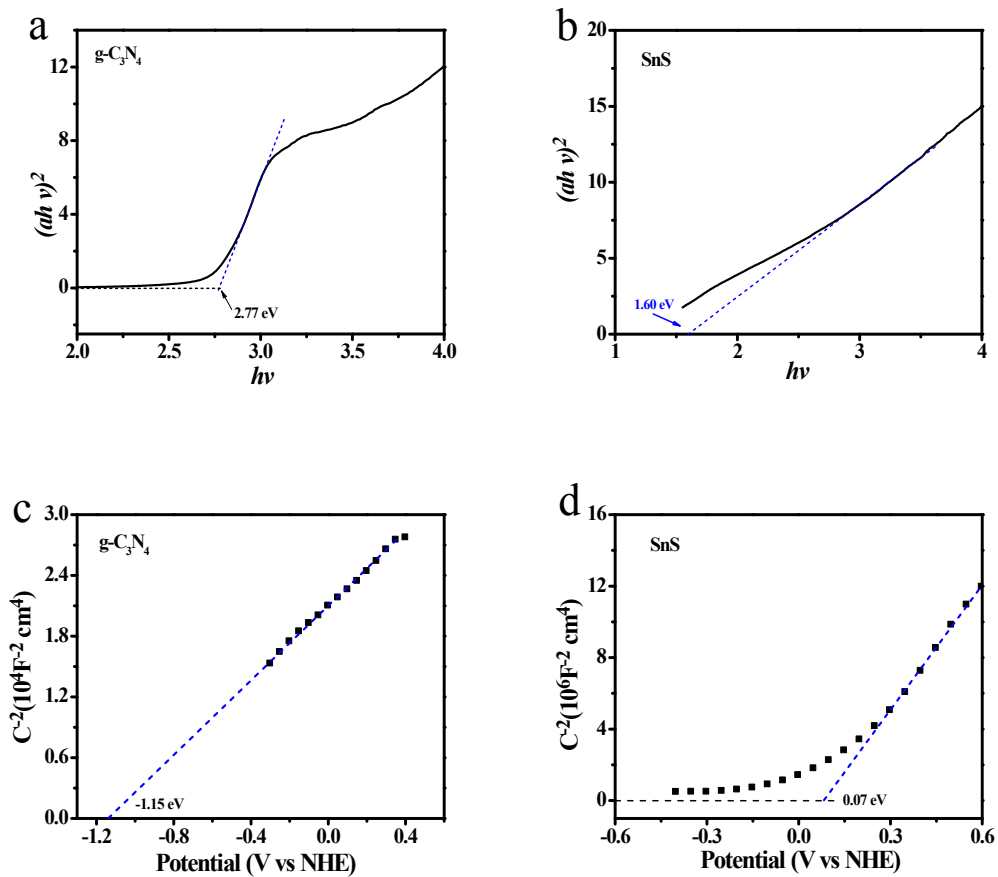

**Figure S2.** Tauc plots of (a)  $g\text{-C}_3\text{N}_4$  and (b) SnS, Mott-Schottky curves of (c)  $g\text{-C}_3\text{N}_4$  and (d) SnS
